# Supplementary material for: Deletion of Lipoprotein PG0717 in Porphyromonas gingivalis W83 Reduces Gingipain Activity and Alters Trafficking in and Response by Host Cells
Source: PubMed Central journal article supplement (PMC3772042; doi:10.1371/journal.pone.0074230), 2013-09-12

## Supporting File 1.

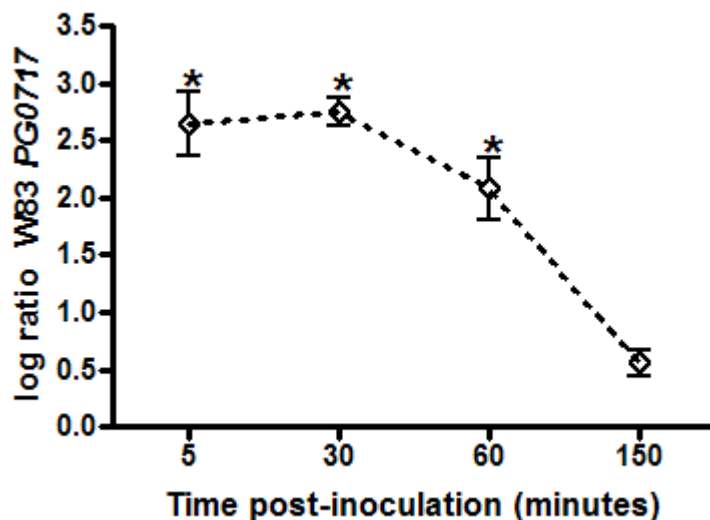

**Figure S1A. The temporal expression of *P. gingivalis* PG0717 during invasion of HCAEC.** Invasion experiments were performed as previously described [Rodrigues and Progulsk-Fox, 2005]. Adhered or internalized W83 was harvested from HCAEC cultures at 5 min, 30 min, 1 h, and 2.5 h post- inoculation and processed for microarray analysis as already described. Briefly, total RNA from W83 broth cultures (prior to invasion) and internalized bacteria was extracted by using 10 ml of Trizol reagent followed by RNA isolation as described by the manufacturer (Invitrogen Life Technologies, Carlsbad, CA). All RNA samples were DNase treated and purified using the RNeasy kit (QIAGEN Inc., Valencia, CA). To separate bacterial total mRNA from poly(A) mRNA, cellular and internalized bacterial RNAs were also treated with the Oligotex kit (QIAGEN) according to the manufacturer's instructions and the supernatant (invasion RNA) was again treated with Trizol LS reagent (Invitrogen Life Technologies). Reverse transcription (RT) and microarray reactions were performed either with 2.0  $\mu$ g of total bacterial RNA (control) or with invasion RNA (200  $\mu$ g of total RNA containing 2.0  $\mu$ g of bacterial RNA), collected from one T-75 flask of invaded HCAEC (per microarray slide), as previously described. Details of the microarrays can be found at <http://www.tigr.org>. The resulting images were analyzed by TIGR Spotfinder 1.0 and TIGR Multiple Experiment Viewer software 1.2 (The Institute for Genomic Research [TIGR] [<http://www.tigr.org>]). The generated files were imported into Microsoft Excel (Microsoft Corporation, Redmond, WA) for subsequent analyses. Gene expression values were log transformed prior to statistical analysis by ANOVA. The results represent the mean log ratio  $\pm$  SD of three independent biological replicate arrays performed with three different RNA samples. \* Mean ratios were statistically different from control ( $P < 0.005$ ).

## Construction and validation of W83Δ717

**Figure S1B.** Gene context of *PG0717* with orientation and approximate position of *erm* insertion

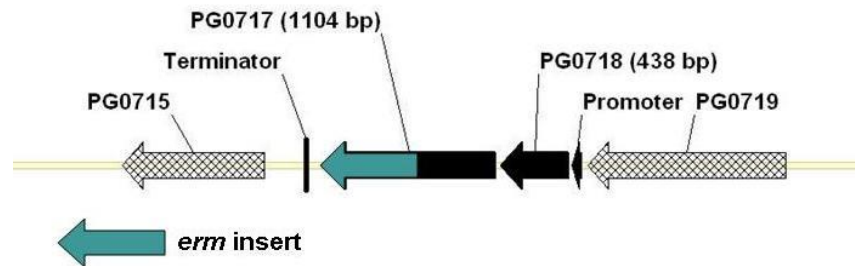

**Table S1: Primers used for mutant construction, sequencing, and Northern blot analysis**

|                 |                      |                                    |
|-----------------|----------------------|------------------------------------|
| Construction    | A fragment - forward | GGGAGCGCGATGGTAAC                  |
|                 | A fragment - reverse | CAGTGCGAGTCTAGATGACAA              |
|                 | B fragment - forward | TTCCATGGCTCCCTTTTCTACTTC           |
|                 | B fragment - reverse | GCCCCGATATTGCGTCAC                 |
| Sequencing      | Erm - forward        | 5'-AAACACGCCAAAGTAAACAATTTA        |
|                 | Erm- reverse         | 5'-CCGTATCCTGATTACTTATATTTGC       |
| Northern probes | 717 - forward        | 5'-AAAGGGAGACCAGGAAGTCGACTTGTCTA   |
|                 | 717 - reverse        | 5'-TTGTTTTTCGTATGCATCATCATCGTAGTCA |
|                 | 718 - forward        | 5'-TGCTAAGGTATCATAACGTAAGATGGACGA  |
|                 | 718 - reverse        | 5'-CACTTCATAGTCTCTACTATCCCGATCGAT  |

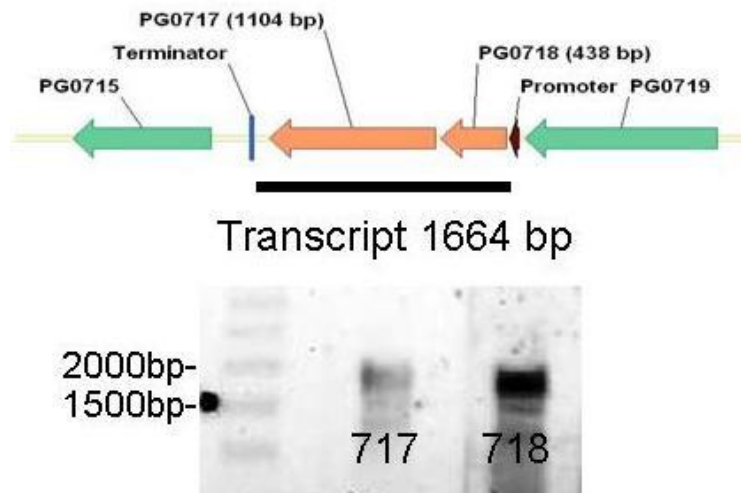

**Figure S1C.** Northern blot analysis of *PG0717* and *PG0718* in *P. gingivalis* W83. *P. gingivalis* was grown to early stationary phase and total RNA was extracted as described in methods. Ten micrograms of total RNA from W83 was loaded into each lane. *PG0717* and *PG0718* mRNA was identified with biotin labeled probes that were constructed using primers listed in Table S1.

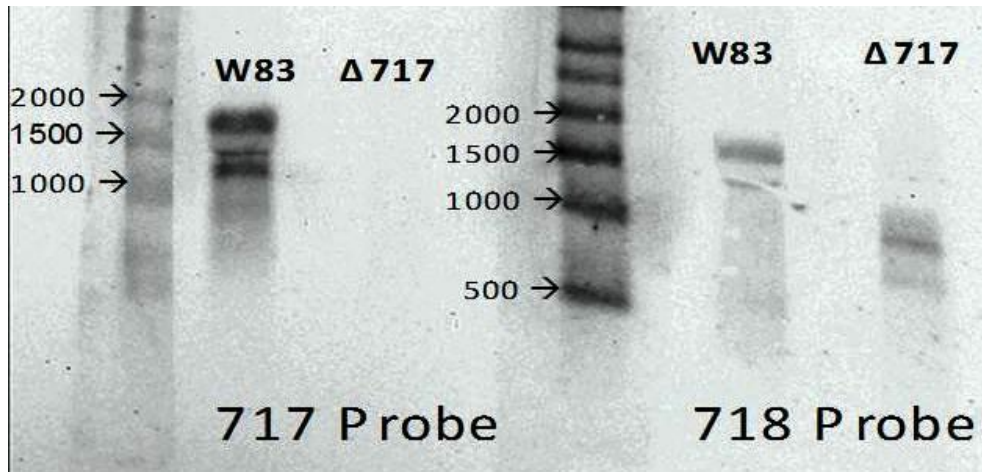

**Figure S1D. Northern Blot analysis of W83 and W83Δ717 (Δ717) *P. gingivalis* strains** were grown to early stationary phase and total RNA was extracted as described in methods. Ten micrograms of total RNA from W83 and W83Δ717 was loaded into each lane. PG0717 and PG0718 mRNA was identified with biotin labeled probes that were constructed using primers listed in Table S1.

**Figure S1E. Sequencing of the genome region flanking *PG0717* in W83Δ717**

**Results of blast analysis of ERM sequence data:**

**PG717 forward erm sequence**

Features in this part of subject sequence:

[putative lipoprotein](#)

Score = 407 bits (220), Expect = 4e-114  
 Identities = 235/242 (97%), Gaps = 2/242 (0%)  
 Strand=Plus/Minus

```

Query 162      GATGACAAAAAATAAAGTTATATGATCTGACAACACTTTTTTCAGGAGGAGCCGACAGCC 221
                |||
Sbjct 770095    GATGACAAAAAATAAAGTTATATGATCTGACAACACTTTTTTCAGGAGGAGCCGACAGCC 770036

Query 222      CTCTGAATGAAGTTAGCATAAAGAACAGAGGGCGATCCAAATATTCTTGGGTCGCCCTCT 281
                |||
Sbjct 770035    CTCTGAATGAAGTTAGCATAAAGAACAGAGGGCGATCCAAATATTCTTGGGTCGCCCTCT 769976

Query 282      TCTTTTTTGCAGGATGAGTACATTTGCCGAT-GCTTCAGTGCAAAAACAATGGTTTCTGA 340
                |||
Sbjct 769975    TCTTTTTTGCAGGATGAGTACATTTGCCGATAGCTTCAGAGCAAAAACAATGGTCTCTGA 769916

Query 341      ATGCAAAAATCTTTTTTCGTTTGCGTGA-AATCTTACCTTTGTGGAGCTGATTTTTTCAG 399
                |||
Sbjct 769915    ATGCAAGCATCTTTTTTCGTTTGCGTGATAATCTTACCTTTGTGGAGCTGATTTTTTCGG 769856

Query 400      CA 401
                ||
Sbjct 769855    CA 769854
  
```

**PG717 Reverse erm sequence**

Porphyromonas gingivalis W83, complete genome  
Length=2343476

Features in this part of subject sequence:

[putative lipoprotein](#)

Score = 263 bits (142), Expect = 6e-70  
Identities = 145/146 (99%), Gaps = 1/146 (0%)  
Strand=Plus/Plus

```
Query 390 TGG-CTCCCTTTTCTACTTCTATGACATAGAATATTTTCGGTACCGTTACGTTCTACCTTA 448
      ||| ||||||||||||||||||||||||||||||||||||||||||||||||||||||||
Sbjct 770793 TGGTCTCCCTTTTCTACTTCTATGACATAGAATATTTTCGGTACCGTTACGTTCTACCTTA 770852

Query 449 TCTATGTCTTCTATTTTCCACTTGGCATATTCACCTTGCCCTCAAAGCAGCTCGGACTGCT 508
      ||||||||||||||||||||||||||||||||||||||||||||||||||||||||
Sbjct 770853 TCTATGTCTTCTATTTTCCACTTGGCATATTCACCTTGCCCTCAAAGCAGCTCGGACTGCT 770912

Query 509 TTAGGCAGGGCGCTGTAGGGAATGTC 534
      ||||||||||||||||||||||||
Sbjct 770913 TTAGGCAGGGCGCTGTAGGGAATGTC 770938
```

**Figure S1F. Comparison of W83 and W83Δ717 growth rates in sTSB broth.**

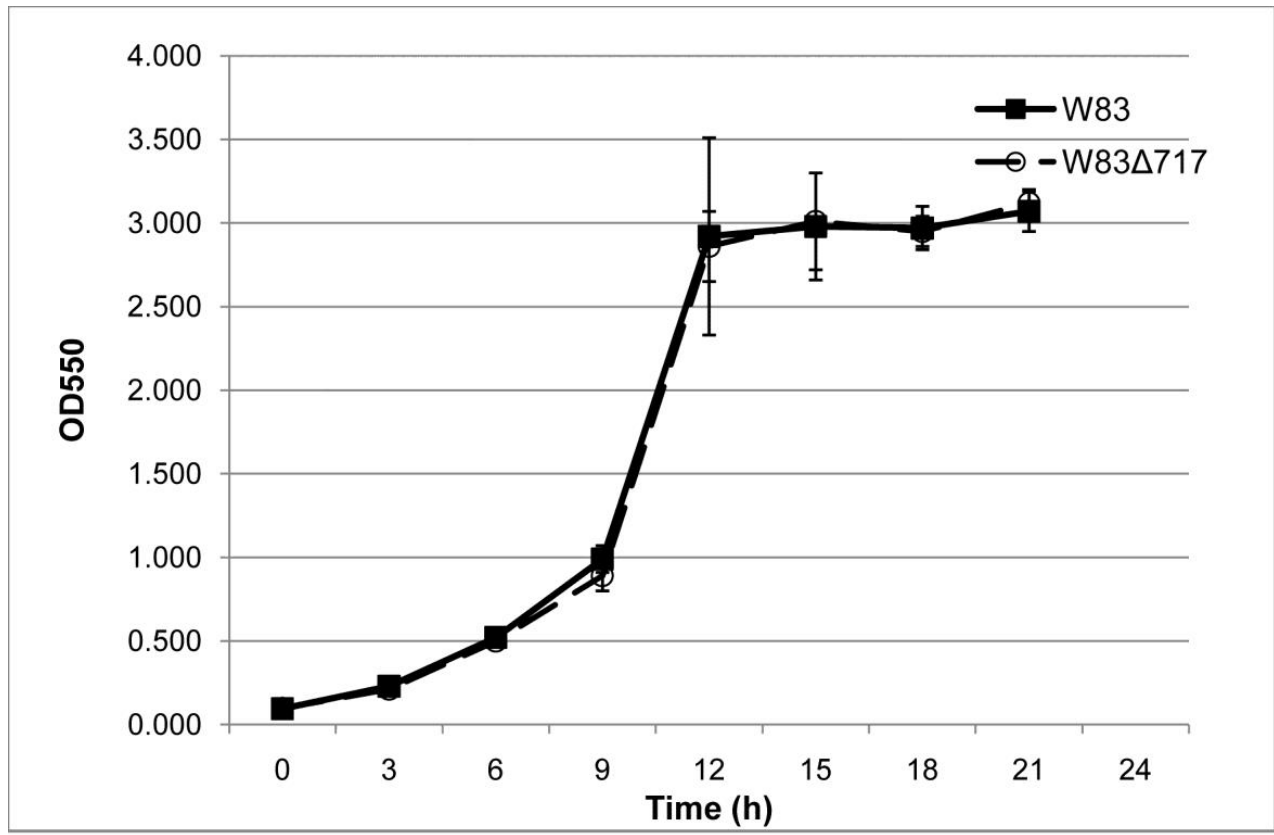

Comparison of the growth of W83 and W83Δ717 was carried out in liquid cultures inoculated with an overnight (18-h) liquid culture of each organism at on OD550 of 0.10 ± 0.01. Growth was monitored spectrophotometrically at OD550 on a SmartSpec Plus spectrophotometer (Bio-Rad, Hercules, CA, USA) every 3 h for 21 h. Values represent the mean ± SD of 3 biological replicates.

W83 sample B

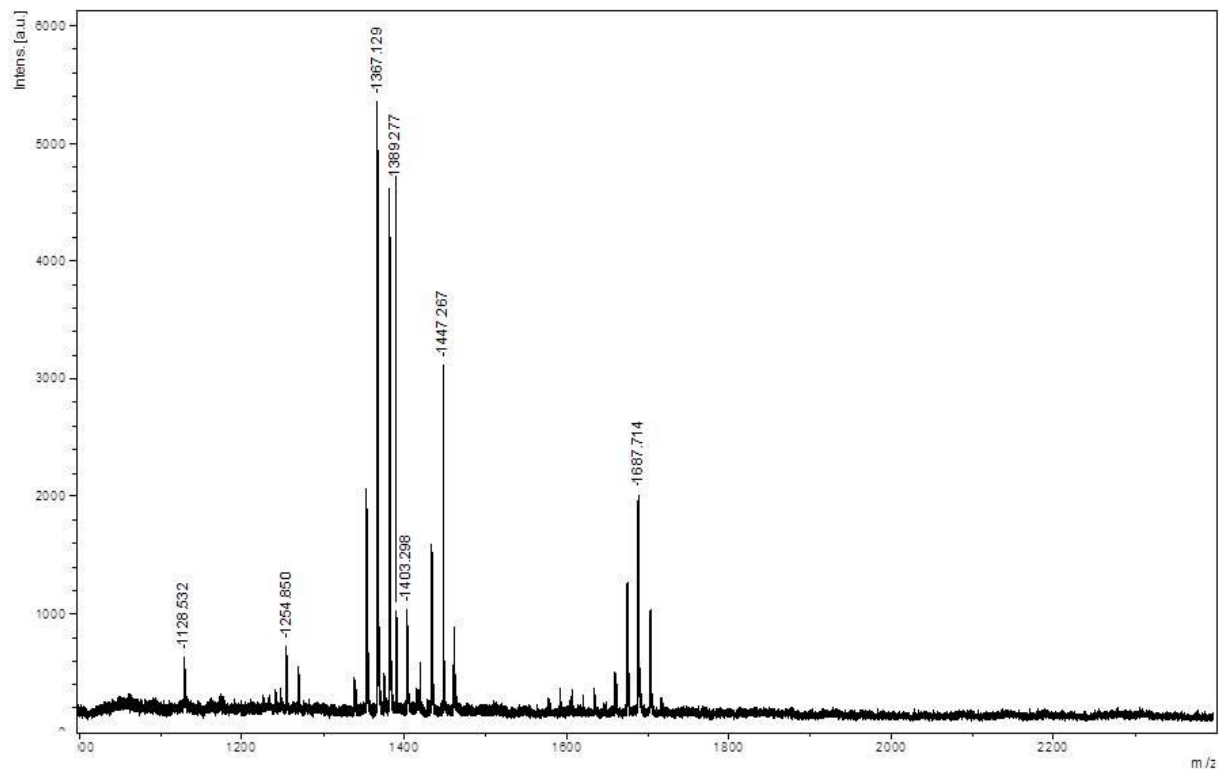

W83Δ 717 sample B

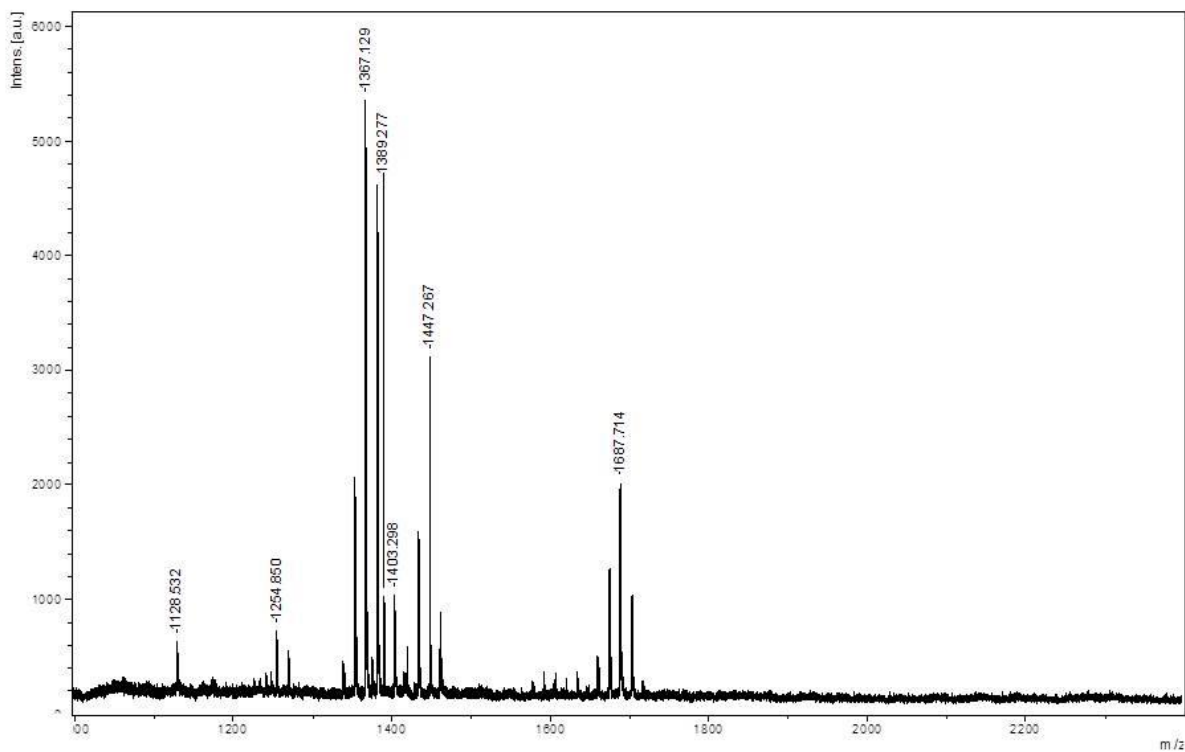

**Figure S1G.** The composition of the lipid A molecule is not significantly altered upon deletion of PG0717. MALDI-TOF/MS of purified lipid A from W83 (panel A) and the 717 deletion mutant (panel B).

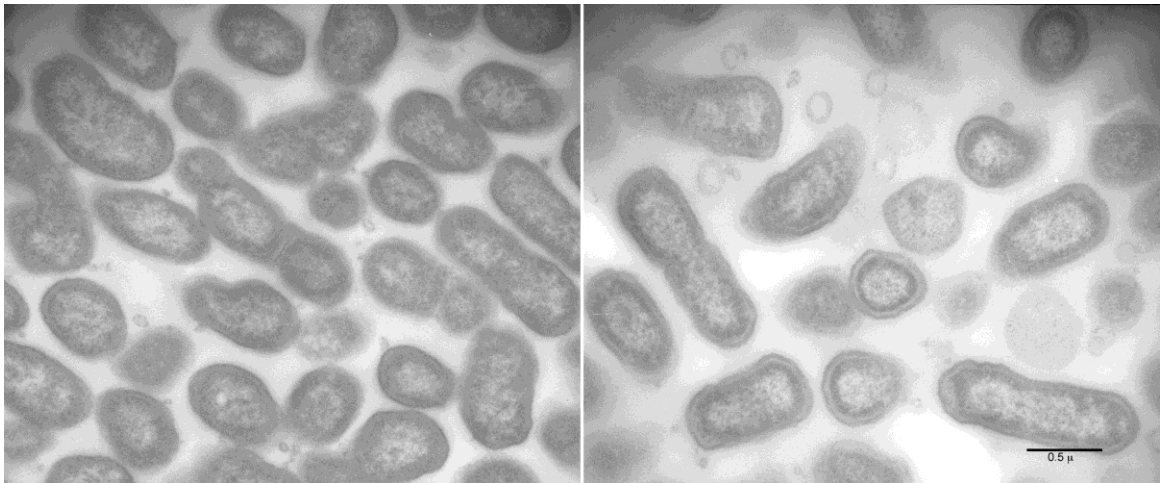

**Figure S1H. Electron micrographs of W83 and W83Δ717 after staining with ruthenium red.** Images are representative of 2 independent sets of stained culture preparations, minimum 3 images per strain per set. Bar, 500 nm.

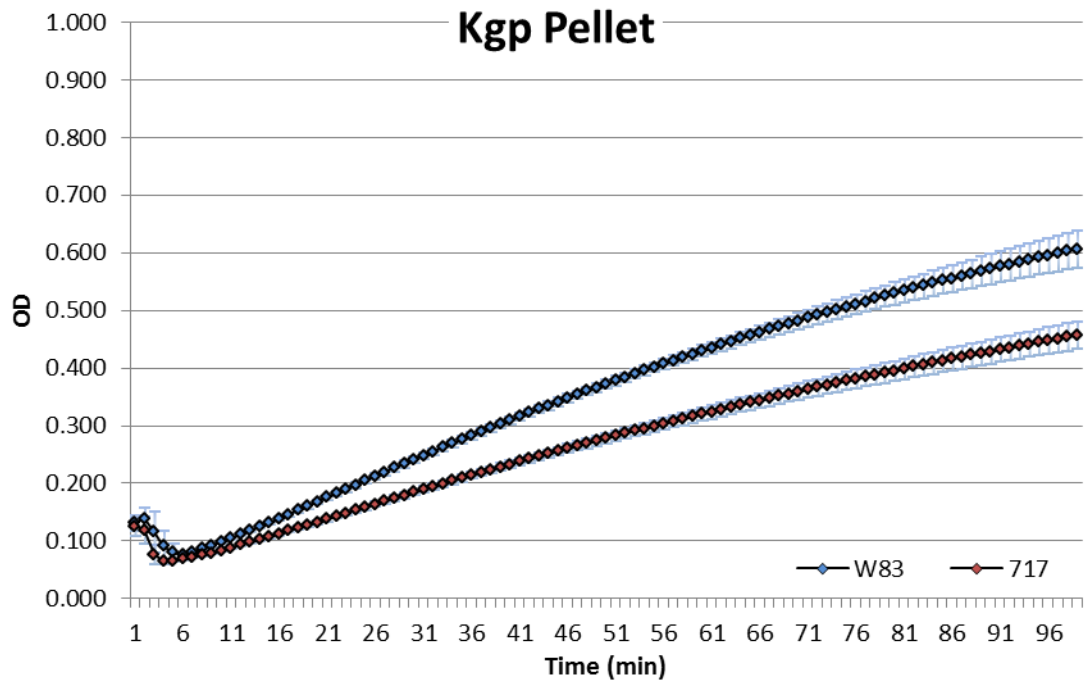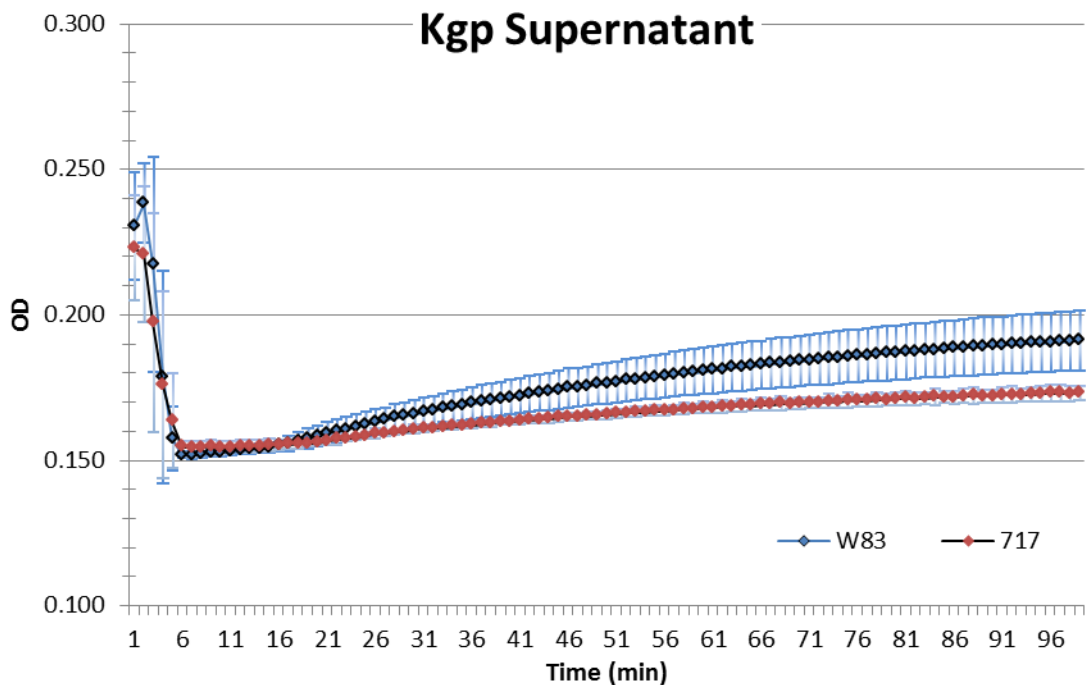

**Figure S1I. Lysine (KGP, upper panels) and arginine (RGP, following page) gingipain activity over time.** Experiments were carried out on bacterial cells (“Pellet”) and culture supernatants (“Supernatant”) of both W83 and W83 $\Delta$ 717 as described in Materials and Methods. Graphs shown are the average  $\pm$ SD of two independent determinations. Slopes from the linear portions of the curves were used to calculate the activity levels reported in Table 1.

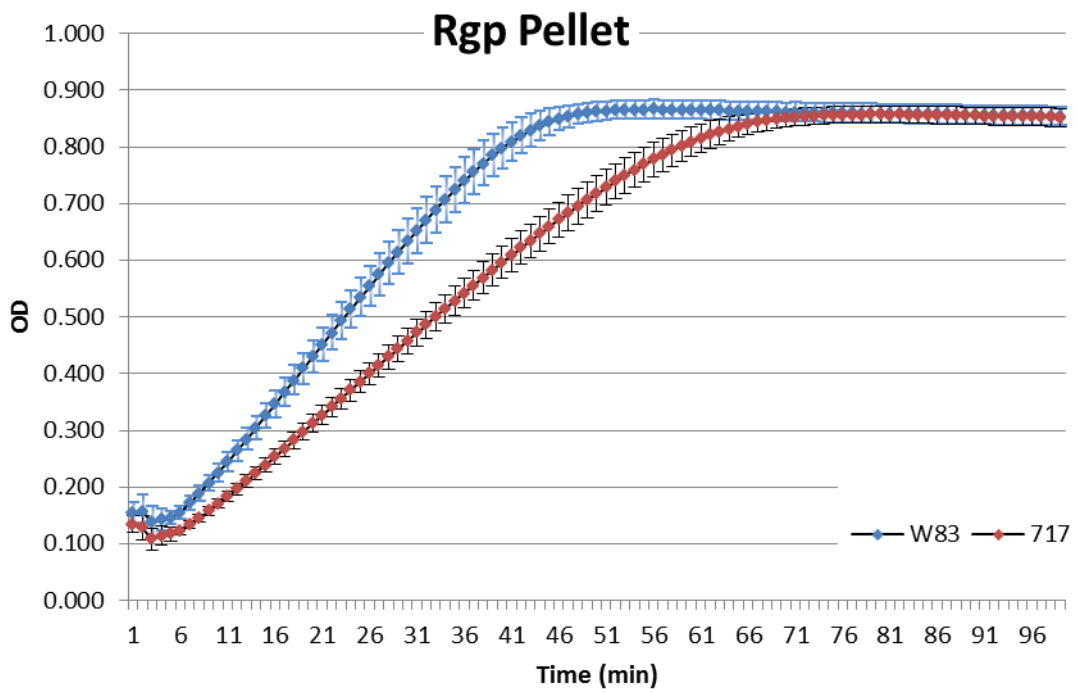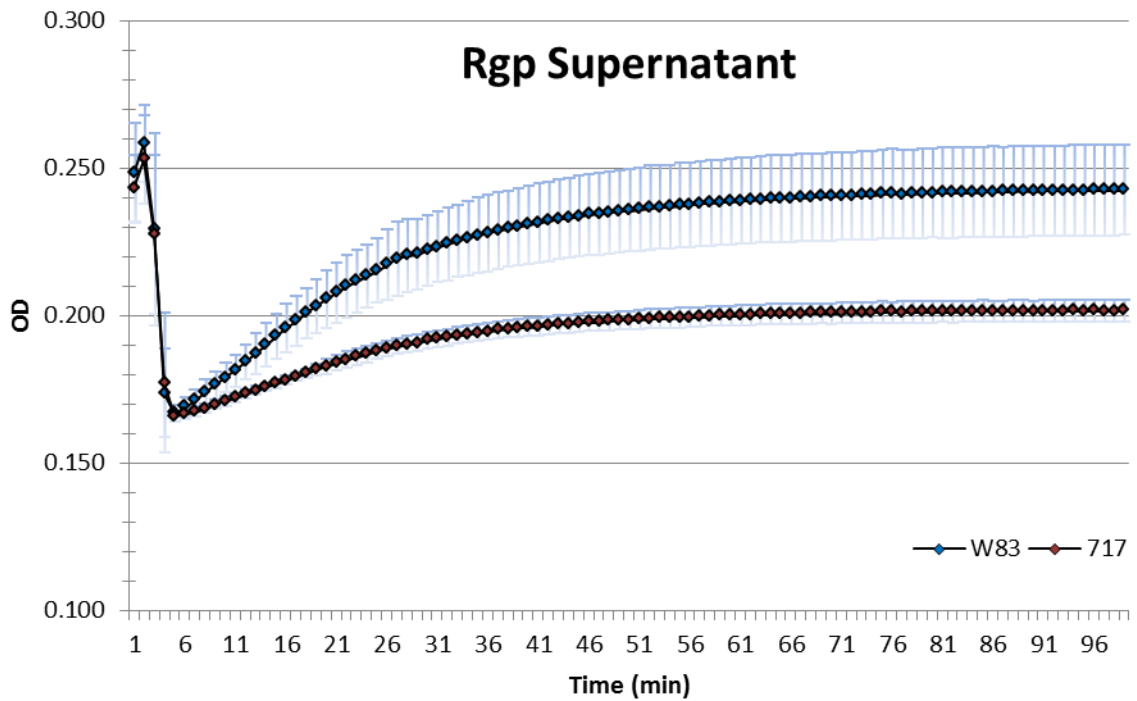

Supplement: pone.0074230.s001.pdf [file pone.0074230.s001.pdf]
